# Supplementary material for: Unfavorable effects of history of volume overload and late referral to a nephrologist on mortality in patients initiating dialysis: a multicenter prospective cohort study in Japan
Source: Springer Nature journal article supplement (doi:10.1186/s12882-018-0859-8), 2018-03-14

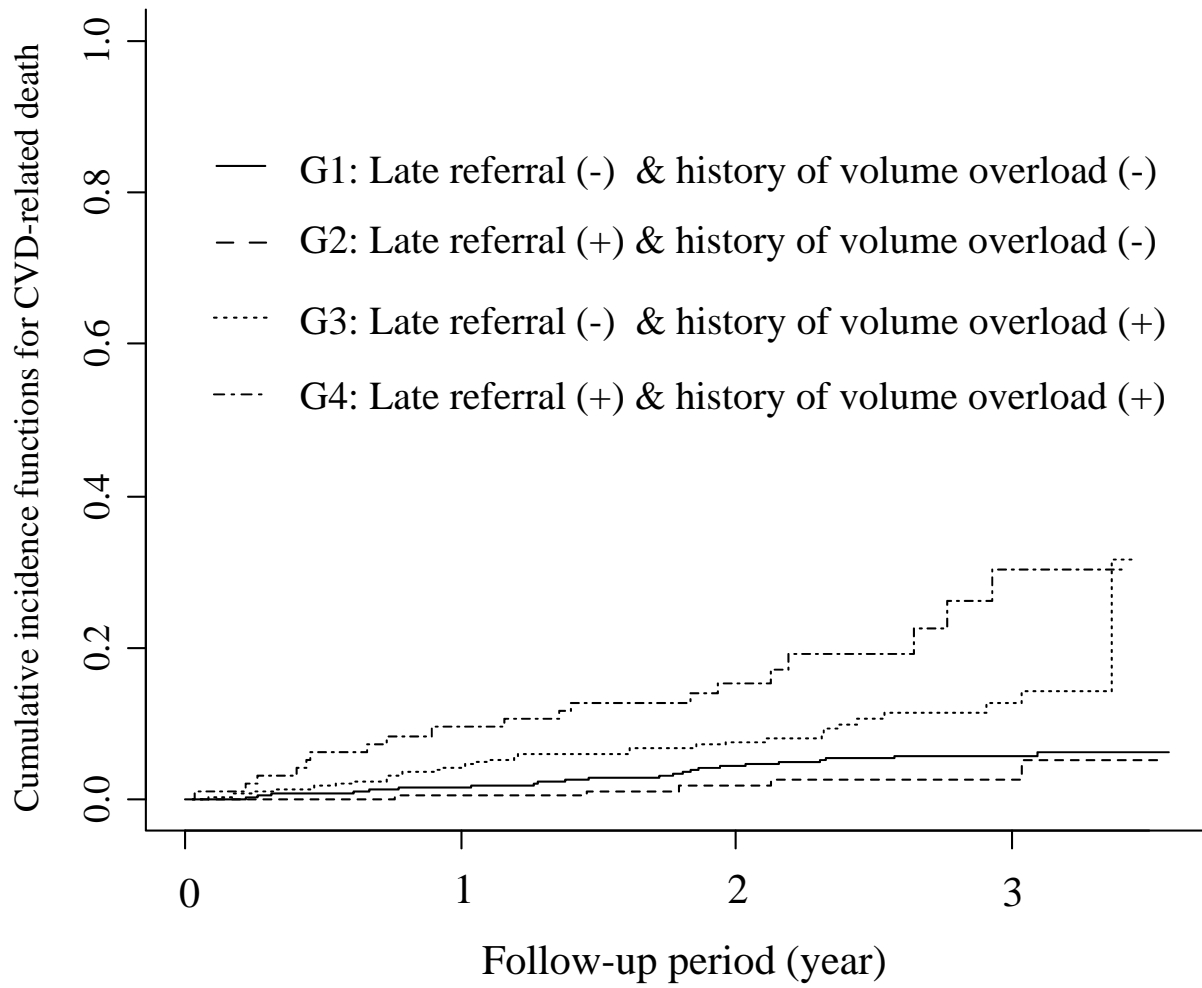

Supplement: MOESM2 [file 15534216]
